# Supplementary material for: GATA-1 Inhibits PU.1 Gene via DNA and Histone H3K9 Methylation of Its Distal Enhancer in Erythroleukemia
Source: PLOS journal article supplement (doi:10.1371/journal.pone.0152234), 2016-03-24

Figure S8

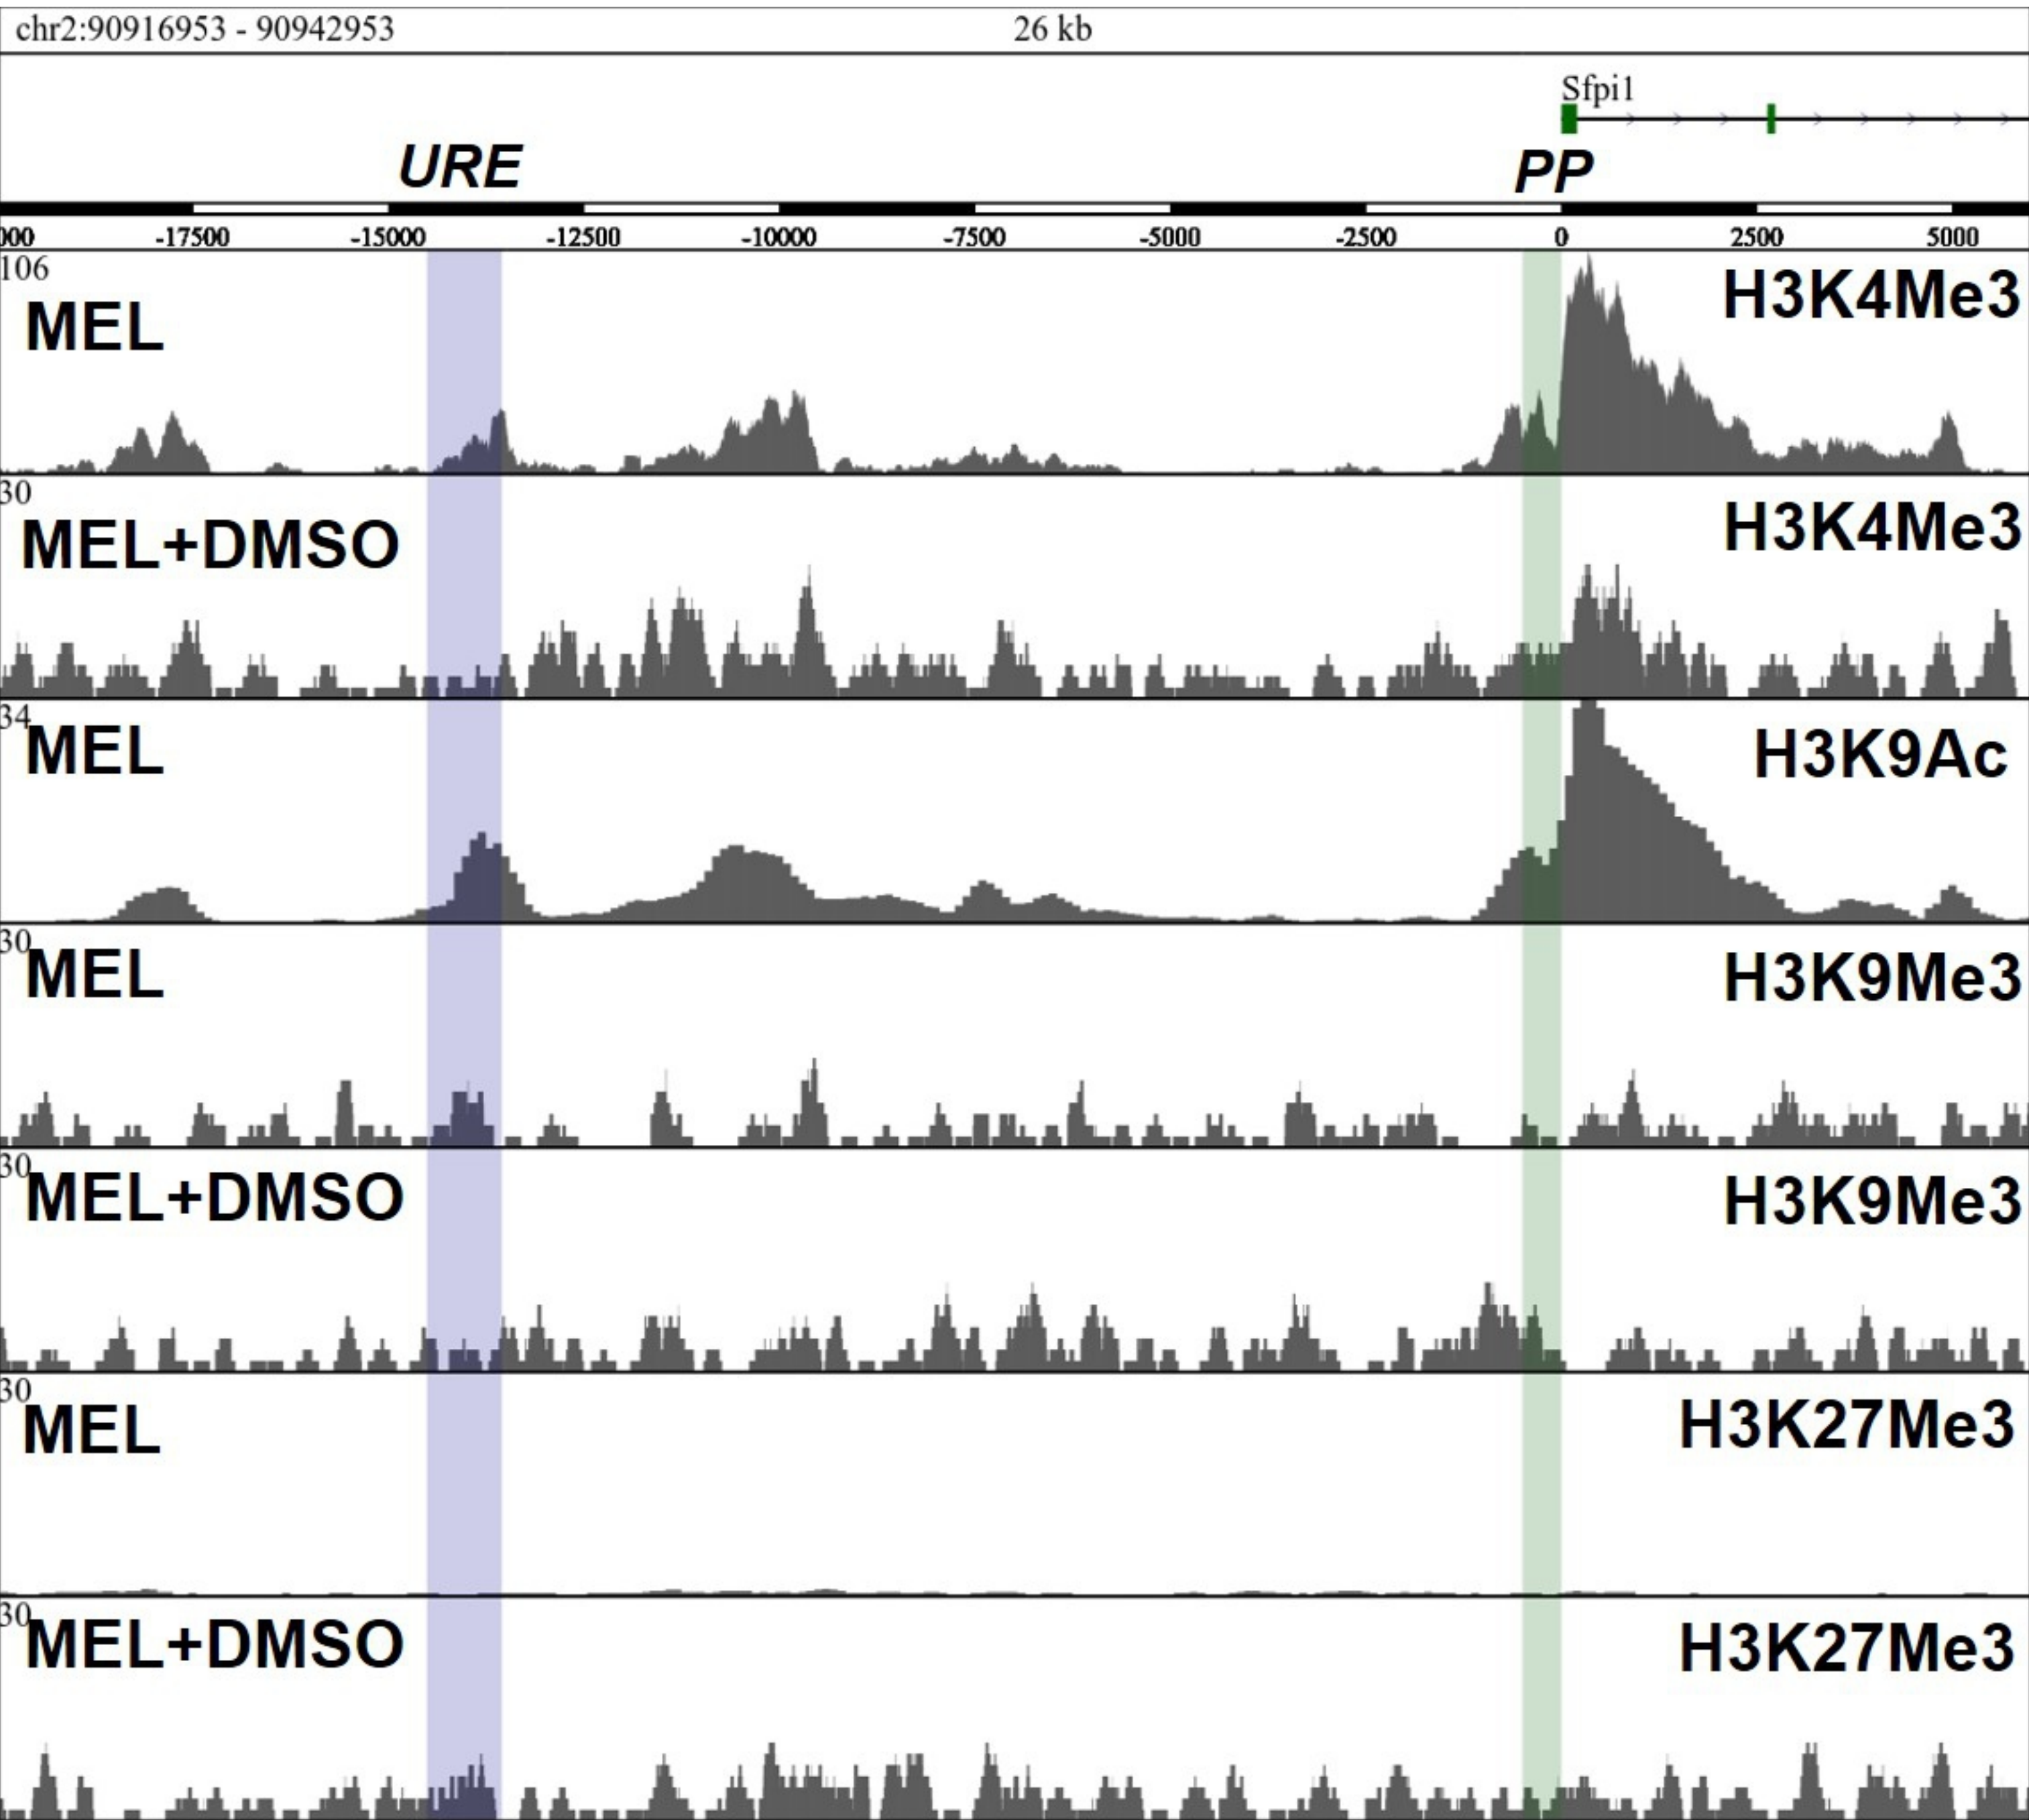

Supplement: S9 (10.1371/journal.pone.0152234.s009) [file journal.pone.0152234.s009]
